1           Integrated group antenatal and pediatric care in Haiti: A  
2                           comprehensive care accompaniment model

3  
4  
5   Meredith C. Jean-Baptiste<sup>1¶\*</sup>, Marc Julmisse<sup>2¶</sup>, Oluwatosin Adeyemo<sup>3¶</sup>, Thamar Julmiste<sup>4¶</sup>,  
6   Jessica L. Illuzzi<sup>3¶</sup>

7  
8  
9   <sup>1</sup> Maternity Department, Hôpital Universitaire de Mirebalais, Zanmi Lasante/ Partners In Health,  
10   Mirebalais, Haiti

11   <sup>2</sup> Executive Direction, Zanmi Lasante/ Partners In Health, Mirebalais, Haiti

12   <sup>3</sup> Department of Obstetrics, Gynecology, and Reproductive Sciences, Yale School of Medicine,  
13   New Haven, Connecticut, USA

14   <sup>4</sup> Journey 9/ Nursing Center of Excellence, Zanmi Lasante/ Partners In Health, Mirebalais, Haiti

15  
16   \* Corresponding Author

17   Email: [mjeanbaptiste@pih.org](mailto:mjeanbaptiste@pih.org) (MCJB)

18  
19   ¶ These authors contributed equally to this work.

20

## 21 **Abstract**

### 22 **Introduction**

23           The J9 Plus (J9) maternal-child accompaniment program is based on four pillars: group  
24 antenatal care (GANC), group pediatric care, psychosocial support, and community-based care.  
25 We aimed to evaluate the impact of the J9 model of care on perinatal outcomes.

### 26 **Methodology**

27           We conducted a convergent mixed methods study of maternal-newborn dyads born in  
28 2019 at Hôpital Universitaire de Mirebalais. Quantitative data was collected retrospectively to  
29 compare dyads receiving J9 care to usual care. A secondary analysis of qualitative data  
30 described patient perspectives of J9 care.

### 31 **Results**

32           Antenatal care attendance was significantly higher among women in J9 (n=524)  
33 compared to usual care (n=523), with 490(93%) and 189(36%) having >4 visits, respectively; p  
34 <0.001, as was post-partum visit attendance [268(51%) compared to 82(16%), p<0.001] and  
35 use of post-partum family planning methods [99(19%) compared to 47(9%), p=0.003]. Incidence  
36 of severe pre-eclampsia was significantly lower in the J9 group [44(9%)] compared to the usual  
37 care group [74(14%)], p <0.001. Maternal and neonatal mortality and low birth weight did not  
38 differ across groups, but with earlier interventions, cesarean delivery [103(20%) and 82(16%),  
39 p<0.001] and preterm birth [169 (34%)] and 128 (27%), p=0.041] were higher in the J9 group  
40 compared to usual care, respectively. In the qualitative analysis, ease of access to high-quality  
41 care, meaningful social support, and maternal empowerment through education were  
42 identified as key contributors to these outcomes.

## 43 **Conclusion**

44           Compared to usual care, the J9 Plus maternal-child accompaniment model of care is  
45 associated with increased engagement in antenatal and postpartum care, increased utilization  
46 of post-partum family planning, and lower rates of severe pre-eclampsia, which remains a  
47 leading cause of maternal mortality in Haiti. The J9 accompaniment approach to care is an  
48 empowering model that has the potential to be replicated in similar settings to improve quality  
49 of care and outcomes globally.

50

## 51 **Introduction**

52           Improving access to and engagement with quality healthcare during pregnancy, birth,  
53 and the months after giving birth has the potential to identify mothers and babies at risk and  
54 assist them in achieving healthy outcomes. Group antenatal care (GANC) is a model of care that  
55 has been shown to increase attendance at antenatal healthcare visits and improve outcomes in  
56 resource-limited regions in many countries, including Nigeria, Kenya, Ghana, Iran, Senegal,  
57 Malawi, Tanzania, Nepal, and Rwanda [1–9]. GANC has been linked to decreases in preterm  
58 birth rates [10], increased adherence to antenatal care visits [1,2,11], use of family planning [3],  
59 exclusive breast-feeding [3], and improved patient and provider satisfaction [4–8].

60           GANC allows providers to spend more time on rich content that is driven by needs of  
61 individuals within the group, allows participants to develop a social support network  
62 throughout their pregnancy and postpartum periods, and reduces wait time for care [12].  
63 Group pediatric visits offer the benefit of newborn screenings and vaccinations, increased time  
64 for education, and parent to parent support. Group visits have been found to be equivalent to

65 individual well-child care [9,13,14] and offer the possibility for such care in regions without  
66 routine well-child care.

67 In Haiti, the maternal mortality rate is the highest in the Western Hemisphere at 529 per  
68 100,000 live births [15], with a lifetime risk of maternal death for 1 in 80 women [16]. Similarly,  
69 the neonatal and infant mortality rates in Haiti are extremely high with 24 deaths per 1000 live  
70 births in the first 28 days of life [17] and 45 deaths per 1000 live births under the age of 1 year  
71 [18,19]. According to the Haitian Ministry of Health (MSPP), 78% of Haitians lack access to  
72 health care due to financial or geographic barriers [20]. Per capita income is less than two  
73 dollars per day making mothers and infants in rural areas particularly vulnerable to disease and  
74 needless death [21]. Pregnant women access antenatal care sporadically and usually for  
75 emergent problems only, with only 42% giving birth in health care facilities with a skilled birth  
76 attendant [16]; postpartum and well-baby visits are not a routine part of the health care  
77 system.

78 Partners in Health/ Zanmi Lasante (PIH/ZL) aimed to increase access to quality services  
79 as well as enhance interventions to reduce maternal and newborn mortality and morbidity in  
80 the Central Plateau at Hôpital Universitaire de Mirebalais (HUM). In July 2018, a collaborative,  
81 interdisciplinary, accompaniment approach to care for pregnant women and infants up through  
82 and beyond nine months of life, referred to as the “Journey to 9 Plus” (J9) began. Drawing on  
83 the strengths of GANC demonstrated in other countries, J9 facilitates access to care and  
84 provides a holistic integrated approach based on the accompaniment model that is the  
85 foundation of Partners In Health (PIH) work. The accompaniment model is characterized by  
86 excellent clinical care with synchronous social support [25]; it is both a philosophy as well as a

87 rubric for programmatic design [25]. Based on pragmatic solidarity with the poor, it proposes  
88 building long-term relationships and walking with the patient [22], rather than leading [23].

89 The four main pillars of the J9 Plus model of care are: 1) group antenatal care (GANC); 2)  
90 group pediatric care; 3) psychosocial evaluation and support; and 4) community-based care  
91 with a home visit and assessment [see Appendix 1]. Interdisciplinary referrals are made as  
92 needed throughout the patient's participation in the program. The goal of this approach is to  
93 increase maternal and infant survival through education, supportive networks of peers and  
94 providers, assessment of and aid in mitigating social determinants and barriers to health, and  
95 earlier identification and referral of threats to maternal and neonatal health.

## 96 **Objectives**

97 The primary goal of this study was to evaluate the maternal and neonatal health  
98 outcomes of the comprehensive J9 Plus program implemented in the Central plateau of Haiti  
99 and to explore the components and characteristics of the program that may be contributing to  
100 its effectiveness as an intervention.

## 101 **Methodology**

102 A convergent mixed methods retrospective cohort study was conducted to evaluate the  
103 impact of the J9 Plus program in the Mirebalais catchment area at HUM. For a full description  
104 of the J9 Plus program, see Appendix 1.

## 105 **Ethics**

106 This study involved human participants and was approved by the Zanmi Lasante  
107 Institutional Review Board (reference #: ZLIRB03022021). The IRB granted a waiver of informed

108 consent for this retrospective analysis of deidentified clinical data. Retrospective quantitative  
109 data was accessed, de-identified, and stored for analysis on a secure platform  
110 on 01/10/2021. A select group of participants gave informed consent for their focus group  
111 transcripts to be used for qualitative analysis. These transcripts were accessed and  
112 translated on 22/01/2022 and then stored in a de-identified manner on a secure platform for  
113 analysis.

## 114 **Quantitative data**

115 The cohort was composed of all patients who gave birth between January 1 and  
116 December 31, 2019 at HUM who resided in the defined Mirebalais catchment area. Patients  
117 who did not live in the defined Mirebalais catchment area, for whom we did not have antenatal  
118 records available, or who had <2 antenatal visits at HUM (and therefore may have had  
119 antenatal care elsewhere) were excluded.

120 Perinatal outcomes of interest included maternal and neonatal mortality and  
121 morbidities, such as severe preeclampsia, hemorrhage, preterm birth, and low birth weight.  
122 Other outcomes of interest included mode of delivery, Apgar scores, number of antenatal and  
123 postpartum visits, and family planning usage.

124 Data was extracted through chart review including electronic medical records (EMR),  
125 paper charts, and hospital and J9 program registers. Maternal variables included chart number,  
126 age, estimated date of delivery, last menstrual period, gravity, parity, number of antenatal  
127 visits, number of postpartum visits, postpartum family planning visit and method, mode of  
128 delivery (vaginal, cesarean, or instrumental vaginal delivery), and presence or absence of  
129 antepartum, intrapartum, and postpartum complications such as preeclampsia, eclampsia,

130 placental abruption, postpartum hemorrhage, fetal demise, and maternal mortality. Neonatal  
131 variables included chart number, date of birth, gestational age at birth (weeks and days), Apgar  
132 score at 5 minutes (and 10-minute Apgar scores when applicable), birthweight, neonatal  
133 mortality, and number of days of hospitalization, if admitted.

134 Maternal variables extracted from the EMR included date of birth and family planning  
135 visits (date and method type). All remaining maternal and neonatal variables were extracted  
136 from paper charts. All data from paper charts were entered into a CommCare data collection  
137 platform.

138 Data was de-identified and kept confidential and anonymous during data analysis.  
139 Quantitative data was cleaned and validated after export (EMR) or data collection (CommCare  
140 App). Characteristics and outcomes of patients in the cohort enrolled in J9 were compared to  
141 those who received usual care using Microsoft Excel 2016 and confirmed by a statistician.  
142 Continuous and categorical variables were compared using t-test and chi-square, respectively.  
143 Odds ratios and confidence intervals were calculated when appropriate.

## 144 **Qualitative data**

145 We conducted secondary analysis of pre-existing qualitative data collected as part of a  
146 J9 program evaluation in order to learn about the experiences of participants in the J9 Plus  
147 program during antenatal care, birth, and postpartum, including the components and  
148 characteristics of the program that participants identified that may be contributing to its  
149 effectiveness as an intervention

150 Between March 10-13, 2020, J9 participants, who had given birth between January 1,  
151 2019 and December 31, 2019 and were engaged in J9 group pediatric care at HUM, were

152 invited to participate in one of three focus group discussions (FGD) after their group visits as  
153 part of a planned J9 program evaluation. The FGDs were conducted in Haitian Creole by a  
154 Haitian sociologist who was not a member of the J9 clinical team. Participants were asked to  
155 describe their experiences of antenatal and post-partum care, home-visits, and psychosocial  
156 support received as part of J9 Plus. The sessions were recorded with verbal patient consent and  
157 later transcribed into Haitian Creole for J9 programmatic evaluation. Consent to review and  
158 analyze responses for research purposes was subsequently obtained from patients. Patients  
159 whose consent for qualitative analysis of the responses could not be obtained were excluded  
160 from this study. As a result, only one FGD which consisted of eight (8) participants was included  
161 for qualitative analysis in this study. The FGD transcripts were translated verbatim from Haitian  
162 Creole to English for review and analysis.

163         Prior to analysis, the transcription was quality-checked by a study team member (MJB),  
164 who is fluent in English and Creole. She reviewed the entire transcript both in English and in  
165 Haitian Creole and compared it against the audio recording. Any differences in transcription  
166 were highlighted for further review and discussed with a third reviewer (TMJ) who then  
167 finalized the transcript for coding.

168         The group Interviews were analyzed using thematic analysis and inductive techniques  
169 from Grounded Theory to develop themes [24]. MJB and OA reviewed the transcripts and  
170 independently performed In Vivo coding. MJB and OA discussed both code application and  
171 themes and agreed on the final code book. They wrote reflexive memos as part of this process  
172 and developed emerging concepts and themes which were refined. Integrative memos were  
173 noted, and all results were discussed with other team members.



## 174 Results

### 175 Quantitative results

176 During the study period, 1,612 women from the Mirebalais catchment area gave birth at  
177 HUM. After exclusions for <2 antenatal visits and lack of antenatal records, 524 women in the J9  
178 intervention group and 523 women in the usual care group met inclusion criteria for  
179 comparison [See Diagram 1].

180

#### 181 Diagram 1: Inclusion Criteria of Women Delivering in 2019 at HUM

182

183 Table 1 shows the baseline characteristics of the two groups. The mean maternal age  
184 was 29 years for the J9 group and 28 years for the usual care group;  $p = 0.001$ . Parity was  
185 similar between the two groups; specifically, 161 (31%) vs 146 (33%) of the respective groups  
186 were nulliparous, 340 (66%) vs 276 (63%) were multiparous, and 16 (3%) vs 19 (4%) were grand  
187 multiparous ( $\geq 5$  deliveries) ;  $p = 0.445$ .

188

189 **Table 1. Baseline Characteristics of J9 and Usual Care Groups**

| BASELINE CHARACTERISTICS | J9 Group<br>n (%) | Usual Care<br>n (%) | p-value |
|--------------------------|-------------------|---------------------|---------|
| <b>Age</b>               | <b>n=524</b>      | <b>n=523</b>        |         |
| 12-19 years              | 25 (4.8)          | 58 (11.1)           | 0.001   |
| 20-34 years              | 393 (75.0)        | 370 (70.8)          |         |

|                                    |                          |                          |                     |
|------------------------------------|--------------------------|--------------------------|---------------------|
| 35 years                           | 106 (20.2)               | 95 (18.2)                |                     |
| Mean (range)                       | 29 (13-46)               | 28 (12-46)               | 0.001 <sup>††</sup> |
| <b>Parity</b>                      | <b>n=517<sup>†</sup></b> | <b>n=441<sup>†</sup></b> |                     |
| Nulliparous                        | 161 (31.1)               | 146 (33.1)               | 0.445               |
| Multiparous                        | 340 (65.8)               | 276 (62.6)               |                     |
| Grand Multiparous (≥ 5 deliveries) | 16 (3.1)                 | 19 (4.3)                 |                     |

190 <sup>†</sup> Note: The n changed for certain variables (where mentioned) due to missing data

191 <sup>††</sup> T-test conducted for this p-value

192

193 Maternal outcomes are detailed in Table 2. Numbers of antenatal care visits differed  
 194 significantly among the two groups, with 34 (7%) versus 334 (64%) having less than 4 visits, 367  
 195 (70%) versus 179 (34%) having 4 to 7 visits, and 123 (23%) versus 10 (2%) having more than 7  
 196 visits among women in the J9 group compared to those receiving usual care, respectively; p-  
 197 <0.001. Prevalence of sexually transmitted infections (STI) in pregnancy did not differ between  
 198 the two groups. Pre-eclampsia with severe features was diagnosed less frequently in the J9  
 199 group compared to the usual care group: 44 (9%) versus 73 (14%), respectively; p-value<0.001.

200

201 **Table 2. Maternal Outcomes for J9 and Usual Care Groups**

| MATERNAL OUTCOMES                 | J9 Group<br>n=524 <sup>†</sup><br>n (%) | Usual Care<br>n=523 <sup>†</sup><br>n (%) | OR [95% CI] | p-value |
|-----------------------------------|-----------------------------------------|-------------------------------------------|-------------|---------|
| <b>Antenatal visit attendance</b> | <b>n=524</b>                            | <b>n=523</b>                              |             |         |

|                                                      |              |              |                   |        |
|------------------------------------------------------|--------------|--------------|-------------------|--------|
| 0 to 3 visits                                        | 34 (6.5)     | 334 (63.9)   |                   | <0.001 |
| 4 to 7 visits                                        | 367 (70.0)   | 179 (34.2)   |                   |        |
| 8 or more visits                                     | 123 (23.5)   | 10 (1.9)     |                   |        |
| <b>STI<sup>++</sup> in Pregnancy</b>                 | <b>n=505</b> | <b>n=518</b> |                   |        |
|                                                      | 11 (2.2)     | 22 (4.3)     | 0.50 [0.24, 1.05] | 0.061  |
| <b>Placental Abruption</b>                           | <b>n=496</b> | <b>n=521</b> |                   |        |
|                                                      | 0 (0)        | 2 (0.4)      | --                | 0.163  |
| <b>Pre-eclampsia with severe features/ Eclampsia</b> | <b>n=506</b> | <b>n=521</b> |                   |        |
|                                                      | 44 (8.7)     | 73 (14.0)    | 0.59 [0.40, 0.87] | <0.001 |
| <b>Delivery Type</b>                                 |              |              |                   |        |
| Caesarian                                            | 103 (19.7)   | 82 (15.7)    |                   | <0.001 |
| Vaginal                                              | 396 (75.6)   | 440 (84.1)   |                   |        |
| Instrumental                                         | 25(4.8)      | 1 (0.2)      |                   |        |
| <b>Post-Partum Hemorrhage<sup>+++</sup></b>          | <b>n=501</b> | <b>n=522</b> |                   |        |
|                                                      | 5 (1.0)      | 9 (1.7)      | 0.57 [0.19, 1.73] | 0.318  |
| <b>Maternal Mortality</b>                            |              |              |                   |        |
|                                                      | 3 (0.6)      | 2 (0.4)      | 1.5 [0.25, 9.01]  | 0.655  |
| <b>Post-Partum Visit ≤ 6 weeks</b>                   |              |              |                   |        |
|                                                      | 268 (51.2)   | 82 (15.7)    | 5.63 [4.21, 7.53] | <0.001 |
| <b>Family Planning</b>                               |              |              |                   |        |

|                                                                   |           |          |                   |        |
|-------------------------------------------------------------------|-----------|----------|-------------------|--------|
| Number of patients starting a method within 12 months after birth | 99 (18.9) | 47 (9.0) | 2.36 [1.63, 3.42] | <0.001 |
|-------------------------------------------------------------------|-----------|----------|-------------------|--------|

202 † Note: The n changed for certain variables (where mentioned) due to missing data

203 †† Sexually Transmitted Infections (STI) diagnosed in pregnancy

204 ††† Post-partum hemorrhage as recorded in the maternal medical record as a complication (yes/no)

205

206 Cesarean delivery occurred more frequently among the J9 participants compared to  
 207 those in usual care [103 (20%) versus 82 (16%)] as did instrumental vaginal delivery [25 (5%)  
 208 versus 1 (0.2%); p-value<0.001], respectively. Post-partum hemorrhage did not differ  
 209 significantly between the two groups [5 (1%) versus 9 (2%); p-value=0.318] nor did maternal  
 210 mortality [3 (0.6%) versus 2 (0.4%); p-value=0.655], respectively.

211 Two-hundred-sixty-one (51%) of J9 participants versus 82 (16%) of women in usual care  
 212 attended their post-partum visit appointment; p-value<0.001. Utilization of a family planning  
 213 method was more common among J9 participants than among those in usual care [99 (19%)  
 214 versus 47 (9%); p-value<0.001], respectively.

215 Neonatal outcomes are detailed in Table 3. Rates of low birth weight were similar  
 216 among the J9 group and those in usual care [94 (19%) compared with 87 (17%), respectively;  
 217 p=0.268]. Among the Apgar categories, more babies in the J9 group were born with Apgar  
 218 scores of 4-7 compared to those in usual care [103 (22%) versus 73 (14%)], respectively,  
 219 coinciding with a decrease in Apgar scores of 8 and greater among J9 participants; p=0.004.

220

221 **Table 3. Newborn Outcomes for J9 and Usual Care Groups**

| NEWBORN OUTCOMES                       | <b>J9 group</b><br>n=528 <sup>†</sup><br>n (%) | <b>Usual care</b><br>n=532 <sup>†</sup><br>n (%) | <b>OR [95% CI]</b> | <b>p-value</b>            |
|----------------------------------------|------------------------------------------------|--------------------------------------------------|--------------------|---------------------------|
| <b>Low Birth Weight</b>                | <b>n=485</b>                                   | <b>n=521</b>                                     |                    |                           |
| <2500g                                 | 94 (19.4)                                      | 87 (16.7)                                        | 1.2 [0.87, 1.65]   | 0.268                     |
| <b>Apgar Score <sup>††</sup></b>       | <b>n=465</b>                                   | <b>n=531</b>                                     |                    |                           |
| Apgar 0 (IUFD)                         | 5 (1.1)                                        | 7 (1.3)                                          | --                 | 0.700                     |
| Apgar 1-3                              | 3 (0.6)                                        | 3 (0.6)                                          |                    | 0.004                     |
| Apgar 4-7                              | 103 (22.0)                                     | 73 (13.9)                                        |                    |                           |
| Apgar ≥ 8                              | 357 (76.3)                                     | 441 (84.2)                                       |                    |                           |
| <b>Gestational Age</b>                 | <b>n=496</b>                                   | <b>n=478</b>                                     |                    |                           |
| <28 weeks                              | 1 (0.2)                                        | 2 (0.4)                                          |                    | 0.041                     |
| 28-36+6 weeks                          | 169 (34.1)                                     | 128 (26.8)                                       |                    |                           |
| ≥37 weeks                              | 326 (65.7)                                     | 348 (72.8)                                       |                    |                           |
| Mean (range)                           | 37.7 (24-44)                                   | 38.3 (23-45)                                     |                    | <0.001 <sup>††</sup><br>+ |
| <b>NICU <sup>††††</sup> Admissions</b> | <b>n=509</b>                                   | <b>n=456</b>                                     |                    |                           |
|                                        | 31 (6.1)                                       | 29 (6.4)                                         | 0.95 [0.57, 1.61]  | 0.863                     |
| <b>Neonatal Demise</b>                 | <b>n=490</b>                                   | <b>n=484</b>                                     |                    |                           |
|                                        | 6 (1.2)                                        | 6 (1.2)                                          | 1.00 [0.84, 1.2]   | 0.983                     |

222 <sup>†</sup> Note: The n changed for certain variables (where listed) due to missing data

223 <sup>†</sup> 9 sets of twins in the usual care group and 4 sets in the J9 cohort explains the newborn group size differences as  
224 compared to maternal cohorts.

225 <sup>††</sup> Apgar score at 5 and 10 minutes were collected and the highest score selected.

226 <sup>†††</sup> T-test conducted for this p-value

227 <sup>††††</sup> NICU (Neonatal Intensive Care Unit)

228

229 Higher rates of preterm delivery were found in the J9 group compared to the usual care  
230 group, most notably between 28 weeks and 36 weeks and 6 days of gestation for 169 (34%)  
231 versus 128 (27%) of all births in each group, respectively;  $p=0.041$ . Mean gestational age among  
232 J9 neonates (37.7 weeks) was lower than neonates born to mothers who received usual care  
233 (38.3 weeks);  $p<0.001$ .

234 There was no difference in NICU admissions between the J9 and usual care group [31  
235 (6.1%) and 29 (6.4%), respectively;  $p=0.863$ ], nor were there differences in neonatal mortality,  
236 with 6 (1.2%) in both groups;  $p=0.983$ .

237

## 238 **Qualitative results**

239 Transcribed FGD data was coded and analyzed for themes and sub-themes [see Table 4].  
240 Four main themes emerged from the data: 1) Empowerment through provision of education  
241 and information; 2) Efficiency and Integrated care; 3) Social support or “The love that is in J9”;  
242 and 4) Perception of reduced morbidity and mortality.

243

244 **Table 4. Themes and Subthemes with Illustrative Quotations**

---

**Table 4. Themes and Subthemes with Illustrative Quotations**

---

| Theme or Subtheme                                                                 | Illustrative Quotation                                                                                                                                                                                                                                                                                                                                                                                                                                                                                                                                                                                                                                                                                                                                                                                                                                                                                                                                                                                                                                                                                                                                                                                                                                                                                                                                                                                                                                  |
|-----------------------------------------------------------------------------------|---------------------------------------------------------------------------------------------------------------------------------------------------------------------------------------------------------------------------------------------------------------------------------------------------------------------------------------------------------------------------------------------------------------------------------------------------------------------------------------------------------------------------------------------------------------------------------------------------------------------------------------------------------------------------------------------------------------------------------------------------------------------------------------------------------------------------------------------------------------------------------------------------------------------------------------------------------------------------------------------------------------------------------------------------------------------------------------------------------------------------------------------------------------------------------------------------------------------------------------------------------------------------------------------------------------------------------------------------------------------------------------------------------------------------------------------------------|
| <b><i>Theme 1: EMPOWERMENT through provision of education and information</i></b> |                                                                                                                                                                                                                                                                                                                                                                                                                                                                                                                                                                                                                                                                                                                                                                                                                                                                                                                                                                                                                                                                                                                                                                                                                                                                                                                                                                                                                                                         |
| Warning signs in pregnancy                                                        | <p>“Thanks to the education they gave us, one of the warning signs; one thing that was useful for me and helped me, but I can say that they helped me the most were the warning signs. Well thanks to the trainings, I was at home one day when I saw that I started to have a streak of blood. And my mother told me that it was good, not to worry, it is my body preparing myself, I am getting ready. But the fact that they taught me that it was a warning sign, immediately, I put clothes on and I came and when I arrived at the hospital, I went to Triage (Women’s Health ER) and when they checked me and they told me I am not yet ready because I was in latent labor, when they sent me outside and then I saw that I was bleeding and broke my water. There was someone who told me that “Oh, you drank too much water”, but me, the fact that J9 educated us, I saw that it was a warning sign and when I went back inside and told them that I broke my water, immediately they put me... they gave me an IV and gave me a bed. Thanks to the training that they did for us, when I was in latent labor, when I broke my water in latent labor. So, the fact that I had the education J9 gave me, then I have my baby. But if I stayed when I broke my water, amniotic fluid, there wasn’t any inside and I could have lost the baby. Then with the education it was very useful, we have a healthy baby and we saved our lives.”</p> |
| Nutrition and Lifestyle changes                                                   | <p>“Our experience in J9 has improved our health and our children’s health in the sense that the training and education they did for us; they talked to us about the dietary food groups that we need to eat, the different foods that we need to</p>                                                                                                                                                                                                                                                                                                                                                                                                                                                                                                                                                                                                                                                                                                                                                                                                                                                                                                                                                                                                                                                                                                                                                                                                   |

---

---

consume (the body builders, the protectors and others) then when we eat these foods, it helps us have a healthy baby and us too, we are in good health, even after we deliver. “

---

Information on care of the baby “... For the baby always, they always talked with us, they always told us ... to be sure. be sure to watch over the babies, to always be mindful of how we take care of the babies.”

---

Empowerment/ teaching others “... I have been doing this because I already gave many others. I explained to them the same way I have been taught during the training. I have done a lot of trainings with other people; I have already referred two people to whom I explained that. To date, I think I will continue to let people know what is in J9, because I love J9 so much, thanks.”

---

### ***Theme 2: Efficiency of the program***

---

Reliable and efficient antenatal care “No, I did not have experience anywhere else, because usually when you go for a prenatal visit, you spend almost the whole day, to get your chart, then they send you to get lab tests, sometimes you aren’t even able to get seen. But with j9, it is different because there is a group and they call you sometimes, they call you for your appointment and when you come, they have you sit down and while you are learning they give you your prenatal check and you don’t even take a lot of time. If it is 8 o’clock you have an appointment, by 10 o’clock or before 10 o’clock you have left and are heading home. So as a pregnant woman sometimes you are not feeling well (have discomfort) so with the J9 program, it has everything you need; it is all that I need. “

---

Integrated care: Connection between antenatal care and hospital care “For me, what I loved about the prenatal consultations while I was pregnant was that sometimes I had discomforts and I did not know what was going on if I wasn’t feeling well. It was when I arrived that they told me and then they did my checkup and then when... baby ... the baby’s heart was beating very fast and

---



---

I never knew it and when I arrived in J9, they told me and they sent me to the Women's Emergency Room and there they measured me and checked everything and they sent me back to J9 again. That I loved. I don't have anything bad to say about that."

---

***Theme 3: "The love that is in J9"***

---

|                                               |                                                                                                                                                                                                                                                                                                                                                                                                                                      |
|-----------------------------------------------|--------------------------------------------------------------------------------------------------------------------------------------------------------------------------------------------------------------------------------------------------------------------------------------------------------------------------------------------------------------------------------------------------------------------------------------|
| Personable and respectful care from providers | "...I enrolled in J9 and I have found a lot of great things in J9, even though it's my fourth child, I have found that they really take care of us. When I come in for a consultation they call me for my checkup, and they always welcome us very well and after I delivered as well, you always receive a warm welcome. That makes me happy for J9 and I always will be. I will never forget J9 for the way they took care of us." |
|-----------------------------------------------|--------------------------------------------------------------------------------------------------------------------------------------------------------------------------------------------------------------------------------------------------------------------------------------------------------------------------------------------------------------------------------------------------------------------------------------|

---

|                             |                                                                                                                                                                                                                                                                                                                                                                                                                                                                                                                                                                                                                                                                                                                                                                                                                                                                                                                                                                                                        |
|-----------------------------|--------------------------------------------------------------------------------------------------------------------------------------------------------------------------------------------------------------------------------------------------------------------------------------------------------------------------------------------------------------------------------------------------------------------------------------------------------------------------------------------------------------------------------------------------------------------------------------------------------------------------------------------------------------------------------------------------------------------------------------------------------------------------------------------------------------------------------------------------------------------------------------------------------------------------------------------------------------------------------------------------------|
| Support from other patients | "So, what impressed me the most.... It's true that the training and education they... they gave us was really important, it really help me. But the love that is inside J9, that impressed me even more. Because the fact that they brought us together in a group, it was like we were in a family. It was like we are sisters. When we delivered, we asked after one another, and we were like we loved delivering and when I gave birth, I remember that I found 2 other mothers, after that there was a third and then there was a fourth. That was like there were four sisters that were there, it was like we were shoulders for one another and when we delivered, we watched over the beds. When it was time to leave, they said I saw you deliver, I will wait for you. And then it was like... just after that we talked on the phone, one will ask after the others, how are the babies, how is the baby. It is like we came to be a family. So, the love that is inside J9, I love that." |
|-----------------------------|--------------------------------------------------------------------------------------------------------------------------------------------------------------------------------------------------------------------------------------------------------------------------------------------------------------------------------------------------------------------------------------------------------------------------------------------------------------------------------------------------------------------------------------------------------------------------------------------------------------------------------------------------------------------------------------------------------------------------------------------------------------------------------------------------------------------------------------------------------------------------------------------------------------------------------------------------------------------------------------------------------|

---

***Theme 4: Perception of reduced morbidity and mortality***

---

---

Prevention for mother

“Thanks to the J9 program everyone can notice that there are fewer children dying and fewer women who die from eclampsia as well. Because there is post-partum eclampsia, I could have had that because when they called me to come for the postpartum visit, I never knew that my blood pressure was so high. I had a blood pressure of 17 over 15 (170/150) if I am not mistaken. So, when I came and they told me my blood pressure was that high, if I did not... if they did not call me for my post-partum visit, I could have had eclampsia or I could have died. So, I need to congratulate and thank the J9 program...”

---

Prevention for infant

“Well, the strong points that I liked about it, is that when they came to visit me, they saw the baby and they noticed that the umbilical cord had not fallen off yet. Me myself, I had not noticed that and when they examined the baby, they saw that the umbilical area was not normal, and they said to me to urgently go to the hospital. The fact that it was late, and they told me to go very early the next morning to the hospital. Then when I came to the J9 pediatrician with her, then it was a really good thing. The fact that if they had not come and perhaps she could have had an infection or even something worse (could have happened). So, for me I don’t see any weak points.”

---

Mental Health Support

“For the mental health consultations, I found them to be very good, because when a woman is carrying a baby, above all, you have lot of hormones and you may sometimes have stress, you can have a problem in your house or with your environment. So, when we have a psychologist to talk to, then that reduces our stress and... for the environment, I managed my environment well and if I had a problem also that knocked me over, then we had the chance to talk with the psychologist to help us manage the problem. That had an effect on the baby, so it is an initiative that I loved so much and it is very good for us in J9.”

247

248 **THEME 1: Empowerment through provision of education and information**

249 *“...With the education it was very useful, we have a healthy baby and we saved our lives”*

250 A recurring sentiment from participants was how the education and information they

251 received from J9 program made them feel empowered. We developed four subthemes that

252 capture the information participants found important.

253 **Subtheme:** Warning signs in pregnancy

254 Participants expressed feelings of empowerment because they were educated about

255 warning signs in pregnancy which led them to advocate for themselves in times of emergencies

256 and make self-referrals to care when they had concerning symptoms. One patient explains how

257 education facilitated the dispelling of myths around bleeding: “My mother told me that it was

258 good, not to worry, it is my body preparing myself...” as well as the water breaking from

259 “drinking too much water.” This participant self-referred to the hospital for care and she was

260 able to advocate for herself; knowing the warning signs, she was able to explain to the staff

261 exactly what was going on. She recognized that she could have lost her baby had she not known

262 this information.

263 **Subtheme:** Nutrition and Lifestyle changes

264 Participants also expressed feeling empowered by the education about nutrition and

265 lifestyle changes they received. The J9 team conducts nutritional education and demonstrations

266 as part of the antenatal and pediatric group health literacy. One participant highlighted the

267 importance of nutritional education on healthy balanced meals for themselves in pregnancy

268 “...then when we eat these foods, it helps us have a healthy baby and us too, we are in good

269 health, even after we deliver.” She explains how she understood the different food groups and  
270 the role of the food groups to stay healthy and have a healthy baby.

271 **Subtheme:** Information on care of the baby

272 Educating parents on baby care starts prenatally, continuing through the group well-

273 baby pediatric appointments. The team focuses on warning signs in the newborn,

274 breastfeeding, weaning foods, and common infant illnesses parents should be aware of. One

275 patient explains the importance of caring for and watching over their infants as was

276 emphasized in the groups, in being aware of danger or warning signs. “... be sure to watch over

277 the babies, to always be mindful of how we take care of the babies.”

278 **Subtheme:** Empowerment/ teaching others

279 Interestingly, participants also reported feeling empowered to also teach others in the

280 community based on what they had learned through J9 group care. One participant stated, “I

281 have done a lot of trainings with other people” and actually referred two other people to J9

282 while expressing her love for J9. Pregnant women are referring one another into J9 is a

283 testament to the satisfaction with integrated care. Other participants said they had heard about

284 J9 from women who had been in the program; it has a reputation in the communities and many

285 patients were referred to the program purely by word of mouth.

286

287 **THEME 2: Efficiency of the program**

288 *“While you are learning they give you your prenatal check and you don’t even take a lot*

289 *of time”*

290 Participants highlighted how efficient they perceived the program compared to  
291 traditional prenatal care. Participants expressed that in usual care, “you spend almost the  
292 whole day”. We developed two subthemes on components of the program the participants  
293 found efficient.

294 **Subtheme:** Reliable and efficient antenatal care

295 Participants expressed appreciation that their appointments were guaranteed and on  
296 time. As a participant stated, “Usually when you go for a prenatal visit, you spend almost the  
297 whole day, to get your chart, then they send you to get lab tests, sometimes you aren’t even  
298 able to get seen. But with J9, it is different because there is a group and they call you  
299 sometimes, they call you for your appointment and when you come, they have you sit down  
300 and while you are learning they give you your prenatal check and you don’t even take a lot of  
301 time. If it is 8 o’clock you have an appointment, by 10 o’clock or before 10 o’clock you have left  
302 and are heading home. So as a pregnant woman sometimes you are not feeling well (have  
303 discomfort) so with the J9 program, it has everything you need; it is all that I need.” Participants  
304 also felt that their 2-hour (group) appointments were efficient because not only did they  
305 receive health care but also benefitted from learning at the same time.

306 **Subtheme:** Integrated care: Connection between antenatal care and hospital care

307 Participants also appreciated the integration and coordination that existed between the  
308 J9 program with the hospital staff and facility. One patient’s comment reinforced the interface  
309 and connection between various locations of care delivery: “...When I arrived in J9, they told me  
310 [about a problem] and they sent me to the Women’s Emergency Room and there they  
311 measured me and checked everything, and they sent me back to J9 again.” In this example of

312 integrated care, the connection between antenatal and hospital care was reinforced through  
313 collaboration and communication between various providers. This patient explains not only the  
314 smooth referral to the Women’s Health ER and back to outpatient J9, highlighting the direct  
315 impact of integrated programs on the patient.

316

### 317 **THEME 3: The love that is in J9**

318 *“But the love that is inside J9, that impressed me even more”*

319 Another main theme was the respectful care that patients felt from their providers and  
320 other women in their group. We developed two subthemes that highlight this caring support.

321 **Subtheme:** Personable and respectful care from providers

322 J9 providers provide personable and respectful care for patients. Providers know them  
323 by name and call them to remind them about their appointments. One participant reiterated  
324 how the patients feel seen and heard and cared for: “I have found that they really take care of  
325 us. When I come in for a consultation they call me for my checkup, and they always welcome us  
326 very well.” This patient explains perfectly what respectful care feels like for a vulnerable  
327 pregnant woman and the importance of feeling welcomed and truly cared for.

328 **Subtheme:** Support from other patients

329 Natural support groups and networks are formed among J9 patient groups during  
330 pregnancy and the babies’ first year. This “family” that the patient formed in bonding with  
331 other mothers in her J9 group served to fill the need they had to truly be there for one another  
332 during their births: “That was like there were four sisters that were there, it was like we were  
333 shoulders for one another and when we delivered, we watched over the beds. When it was

334 time to leave, they said I saw you deliver, I will wait for you... It is like we came to be a family.  
335 So, the love that is inside J9, I love that.” This sisterhood support network, as this participant  
336 explains, allowed them to help one another during labor, delivery, and immediate post-partum,  
337 stating that they will wait for one another and later call on the phone, asking how they were  
338 doing. The patient expresses this deep caring as “love that is inside J9”.

#### 339 **THEME 4: Perception of reduced morbidity and mortality**

340 *“Thanks to the J9 program everyone can notice that there are fewer children dying and*  
341 *fewer women who die from eclampsia as well”*

342 This last theme highlights the perception of fewer women and children dying in the  
343 community and the detection of warning signs both during facility visits and home visits; the  
344 counseling and support provided to vulnerable participants was highlighted in the three  
345 subthemes generated here.

346 **Subtheme:** Prevention for mother

347 This participant summarized the noticeable impact of J9 in terms of community  
348 perception of reduced morbidity and mortality. The participant explains that “everyone” is  
349 noticing that there are fewer women and children dying. The perception of averting avoidable  
350 deaths, she elucidates through her own personal experience with post-partum severe pre-  
351 eclampsia that the J9 program saved her life: “Because there is post-partum eclampsia, I could  
352 have had that because when they called me to come for the postpartum visit, I never knew that  
353 my blood pressure was so high... if they did not call me for my post-partum visit, I could have  
354 had eclampsia or I could have died.” Here another aspect of the program is highlighted: post-

355 natal care. The recognition and referrals to urgent care in cases with obstetrical warning signs  
356 pre- and post-natally is essential in reducing maternal mortality.

357 **Subtheme:** Prevention for infant

358 Another example of perception of reduced morbidity is highlighted when a participant  
359 explained the prompt recognition of pediatric warning signs during a home visit by the J9 team  
360 and the ease of community-to-hospital care. "...when they came to visit me, they saw the baby  
361 and they noticed that the umbilical cord had not fallen off yet... they saw that the umbilical area  
362 was not normal, and they said to me to urgently go to the hospital." The participant explains  
363 that during the home visit, the problem was identified during an examination by the J9 nurse  
364 accompagnateur. She was urged to take the infant immediately to the hospital for care. It is for  
365 reasons such as these that community-based care/ home visits are a key pillar of the program.

366 **Subtheme:** Mental Health Support

367 From a programmatic angle, psychosocial support and counseling is another main pillar  
368 of J9. All antenatal and post-partum patients are screened for post-traumatic stress disorder  
369 and depression. This aspect of the program facilitates access to resources for patients who are  
370 victims of gender-based violence (GBV) or who have depression or other mental health needs.  
371 Some stress-reducing activities are also integrated in the group visits, an added benefit for the  
372 patients especially given the insecurity and socio-political instability in the country; additionally,  
373 "...If I had a problem also that knocked me over, then we had the chance to talk with the  
374 psychologist to help us manage the problem. That had an effect on the baby, so it is an initiative  
375 that I loved so much, and it is very good for us in J9." This quote highlights the impact that  
376 psychosocial support has on J9 patients in being able to cope with stressors.



## 377 Discussion

378 We report the results of J9 Plus, a novel integrated accompaniment care model in  
379 maternal and child health care implemented in the central plateau of Haiti. In this cohort of 524  
380 maternal-infant dyads receiving the J9 model of care and 523 receiving usual care, we did not  
381 detect differences in maternal and neonatal mortality, which remains high across the groups at  
382 0.4-0.6% (40-60/10,000) and 1.2% (12/1000), respectively. The leading causes of maternal  
383 mortality in Haiti are late-stage severe pre-eclampsia and eclampsia (37.5%) and post-partum  
384 hemorrhage (22%), followed by infection and other causes [25], while the leading causes of  
385 neonatal mortality are complications of preterm birth, birth asphyxia, congenital anomalies,  
386 and infection. Several important outcomes of the J9 model are therefore notable. The J9 model  
387 is associated with increased engagement in antenatal and postpartum/infant care, reduced  
388 rates of severe pre-eclampsia, and increased use of post-partum family planning methods, all  
389 factors that may lead to lower rates of the common causes of morbidity and mortality in low-  
390 and middle-income countries (LMICs).

391 At Zanmi Lasante, the J9 model was associated with significantly higher attendance and  
392 engagement in antenatal and post-partum care compared to patients in usual care. Adherence  
393 to antenatal care was 70% vs. 34.2% for 4-7 visits and 23.5% vs. 1.9% for 8+ ANC visits  
394 respectively and 51% vs. 16% for postpartum care, respectively. As no transport or other  
395 incentive was given to participate, we hypothesize that the J9 model, based on the PIH  
396 comprehensive accompaniment model of community-focused care, is better meeting patients'  
397 needs and promotes patient confidence in their providers and therefore increased engagement  
398 with care. Overall, quantitative and qualitative findings of the study demonstrated that the J9

399 intervention was associated with similar outcomes of GANC studied in other LMICs [1–4] in  
400 terms of better patient education and information shared in the groups [1–3,8], increased  
401 adherence to care [1–3], and increased family planning uptake [4].

402         As noted, our study documented a lower rate of severe pre-eclampsia in the J9 group  
403 compared to women receiving usual care. We hypothesize that J9 patients with elevated blood  
404 pressures were identified earlier during group antenatal care and home visits and that patients  
405 in J9 self-presented earlier to the hospital when they had warning signs, as a result of repetitive  
406 and reinforced health education during group visits and home visits. This was also supported by  
407 the themes identified in our qualitative data analysis, related to education, access to integrated  
408 care, and perceived efficacy of the model; “...everyone can notice that there are fewer children  
409 dying and fewer women who die from eclampsia as well.” The community perception of  
410 reduced morbidity and mortality is an important perspective when considering the uptake and  
411 sustainability of the J9 program.

412         We hypothesize that interventions to avoid progression of hypertensive disease of  
413 pregnancy and pre-eclampsia also impacted timing of delivery and mode of delivery. The J9  
414 group had higher preterm birth and cesarean delivery rates and lower neonatal birthweights  
415 compared to the usual care group. The greater numbers of antenatal care visits among J9  
416 participants afforded opportunities for increased screening for complications of pregnancy as  
417 well as more efficient referral for expedited delivery. Earlier presentation to care and expedited  
418 delivery via cesarean may also have contributed to the lower Apgar scores observed among  
419 neonates in the J9 group; all of these findings merit further study to elucidate the reasons for  
420 preterm birth and cesarean delivery among participants in the J9 model.

421 Accompaniment provides direct care to patients and establishes a close rapport while  
422 providing holistic support over the long term. Community-based care is a central component to  
423 this model of care. Providers, residents, and staff in outpatient and inpatient maternal-child  
424 health services have accompanied the J9 team on home visits to communities to provide care,  
425 supporting the social medicine aspect of the PIH approach to meeting patients' individual  
426 needs, addressing social determinants of health. This approach impressed upon our staff and  
427 trainees how these social determinants of health may impact patient outcomes and helped to  
428 strengthen the community's confidence in the health care team. From reports in 2019, 76% of  
429 patients enrolled in J9 received at least one home visit by the J9 team. We believe that this  
430 approach positively impacted our outcomes as the team had individual time with pregnant  
431 mothers and babies in their homes, permitting nutrition evaluation and counseling, water,  
432 sanitation and hygiene (WASH), mother-child clinical evaluation, and couples' psychosocial  
433 evaluation and counseling, in addition to increasing access to family planning counseling and  
434 LARC subcutaneous implants placed in the privacy of patients' homes. Multi-generational  
435 counseling and education on key J9 messages exposed families to the same information that  
436 mothers receive in J9, which we theorize helped reinforce early presentation to care in cases of  
437 emergencies.

438 One in five women suffer from anxiety during pregnancy [26,27] the prevalence of  
439 perinatal anxiety is higher in LMICs [29] at one in four women [28,29] and increases the risk for  
440 adverse health outcomes for mother and newborn [30]. Psychological interventions, such as  
441 psychosocial support and counseling, have been shown to reduce perinatal anxiety and stress  
442 [31], which can impact perinatal outcomes [31]. As one of the main pillars of the program,

443 patients in J9 have benefited from antenatal detection and treatment of antenatal and  
444 postpartum PTSD and depression. Our qualitative results show that patients valued the  
445 importance of the support that the psychosocial team provides: "...stress, you can have a  
446 problem in your house or with your environment, so when we have a psychologist to talk to,  
447 then that reduces our stress..." Additional research is needed to elucidate the impact of  
448 perinatal psychosocial support and counseling on maternal and newborn outcomes in J9.

449 As described, the J9 Plus maternal- child accompaniment model is translatable to other  
450 LMICs. Traditional antenatal care requires multiple providers to engage in numerous short one-  
451 on-one visits with little time for education and psychosocial support. It also requires multiple  
452 patient examination rooms and often results in long wait times and limited numbers of  
453 appointments leaving many patients with limited access to care. Moving to the J9 model of  
454 antenatal care required one larger space to meet in the group format (in our case 10-11  
455 patients in a group), assignment of three personnel (a health care practitioner, a nurse, and an  
456 assistant) to assist with intake, essential screenings (e.g., blood pressure, fundal height, and  
457 fetal heart tone assessment), and record-keeping, followed by the interactive session focused  
458 on education and psychosocial support. It also required trainings of all team members and a  
459 commitment to interdisciplinary, educational, and patient-centered care. Additionally, the J9  
460 Plus model included a psychologist and a social worker. Providing community-based care  
461 requires additional resources for travel and available personnel to leave the primary site of care  
462 on a weekly basis. We acknowledge that translating this model as described requires resources  
463 that all sites may not have readily available. However, the benefits of the model include more

464 efficient and cost-effective means of providing high-quality care as noted in the GANC  
465 component of our model.

466         The benefits of an intervention like the J9 Plus are not limited to low resource countries  
467 like Haiti. The United States, a high-income country, reports a higher incidence of maternal  
468 morbidity and mortality among Black women compared to their white counterparts [32]. In  
469 studies in the US, GANC has been associated with lower rates of preterm birth and higher rates  
470 of breastfeeding compared to usual care [10,33]. New models of care involving multidisciplinary  
471 approaches, attention to mental health, and community-based care are being proposed [34].  
472 Improved perinatal and postpartum support inclusive of doulas has also been endorsed [35].

## 473 **Limitations**

474         Our analysis has limitations that should be acknowledged in considering the results and  
475 planning future studies. First, the study cohort is limited to patients who delivered at HUM, as  
476 it was not possible for the team to gather maternal and neonatal outcome data on patients  
477 who delivered at home or in another facility [25]. Likewise, the cohort is limited to patients who  
478 had at least two documented antenatal care visits at HUM; those who had less than two visits  
479 were not included in the comparison group because there was limited access to their antenatal  
480 records and care, which may have occurred elsewhere or not at all. The exclusion of patients  
481 with minimal documented antenatal visits in the comparison group likely mitigated the  
482 measurable positive benefits of the J9 intervention because the comparison (usual care) group  
483 in this cohort likely had better care than the general population where many women have little  
484 or no care and often give birth outside of the hospital.

485 Patients included in the J9 group voluntarily enrolled in this program and may reflect a  
486 group more predisposed to engagement with healthcare and its benefits. Patients who started  
487 antenatal care late in pregnancy (after 20 weeks of gestation) could not enroll and often  
488 became members of the usual care group. These factors could bias results in favor of the J9  
489 model of care.

490 Our study is subject to limitations associated with retrospective studies including  
491 misclassification and missing data for some variables. The post-partum hemorrhage rate of <1%  
492 in this cohort is not reflective of national statistics reporting a 22% rate of post-partum  
493 hemorrhage [25], but this rate is consistent with institutional statistics and may be reflective of  
494 how post-partum hemorrhage is documented at HUM, with only severe post-partum  
495 hemorrhage being recorded in the medical record. Likewise, intrauterine fetal demise and  
496 immediate perinatal demise were hard to differentiate as both were noted to have Apgar  
497 scores of zero at birth without additional documentation. Lastly, there is a lack of first trimester  
498 dating ultrasonography available for all patients at HUM. When last menstrual period was  
499 unknown or estimated, gestational age estimation was based on physical exam (fundal height)  
500 at antenatal visits. Therefore, this estimate could be a source of misclassification or bias if J9  
501 participants had more accurate gestational age estimation due to the increase in number of  
502 antenatal visits.

503 The lack of robust electronic medical records maintained at facilities in the Central  
504 Plateau Department (region) of Haiti and the fact that the remaining data was collected from  
505 paper charts and entered on the CommCare app for data analysis led to missing and unavailable  
506 data for some variables. When this occurred, the number of subjects analyzed differed from the

507 number in the total group. These differences varied between 0 and 16%. Over 10% missing data  
508 points were noted for: maternal age in the usual care group (16%); Apgar score in the J9 group  
509 (12%); gestational age in the usual care group (10%); and NICU admissions in the usual care  
510 group (15%).

511 In terms of the qualitative data gathered and analyzed, as explained above, only one  
512 focus group was coded and analyzed; however, we detected saturation of themes and sub-  
513 themes in the data provided by each of the participants and feel that the qualitative data  
514 analysis provides a holistic view of the patient experience with J9.

515 Lastly, this study was limited in its ability to compare infant outcomes in the first year of  
516 life among J9 participants and those in usual care. As the hospital is unable to provide standard  
517 “well-baby checks” or to prospectively follow infants in usual care, outcomes of pediatric group  
518 visits in J9, such as rates of malnutrition, hospitalization, and emergency visits, cannot at this  
519 time be meaningful compared to infants in usual care.

520 Fortunately, the J9 program continues to grow nationally and expand to other facilities  
521 providing an enlarging cohort in which to measure outcomes in the future. A larger  
522 programmatic evaluation to examine qualitative and quantitative outcomes on a greater scale  
523 would be beneficial.

## 524 **Conclusion**

525 The J9 Plus maternal-child accompaniment model provides patient-centered and  
526 community-based holistic health care complemented by psychosocial support and education in  
527 antenatal and pediatric groups. Our study shows that in comparison to usual care, the J9 Plus  
528 model is associated with improved engagement with antenatal care and reduced rates of

529 severe pre-eclampsia, the leading cause of maternal death in Haiti. In addition, the J9 model is  
530 associated with increased engagement with postpartum care and increased utilization of post-  
531 partum family planning methods. The accompaniment model is at the core of PIH’s work, and  
532 this is the first time it has been studied in the perinatal health setting. While differences in  
533 maternal and neonatal mortality have not yet been demonstrated, the reduction in severe  
534 preeclampsia and the increased engagement with postnatal pediatric care are promising  
535 measured outcomes. As a model that is developed to meet the ongoing and emerging needs of  
536 patients and families in a community, the J9 approach can be implemented beyond Haiti in  
537 settings with poor or disparate maternal and neonatal outcomes impacted by social  
538 determinants of health and limited resources.

## 539 **Acknowledgements**

540 No funding went into conducting this research project however, the Journey to 9 Plus  
541 (J9) program is supported by the W.K.Kellogg Foundation, Elsa & Peter Soderberg Charitable  
542 Foundation, Caerus Foundation, Peter Gilgan Foundation, Schejola Foundation, Lohengrin  
543 Foundation and the Kaelen and Simon Haworth Foundation. The team would like to especially  
544 thank Emmanuel Demosthene and Jimmy Jean-Baptiste for all of their support and help with  
545 the data collection.

## 546 **Authorship**

547 All authors reviewed the data; MCJB analyzed the quantitative data and reviewed with a  
548 statistician; MCJB and OA coded and analyzed the qualitative data, developed themes and  
549 subthemes. All authors contributed to the writing and editing of the final manuscript.



## 550 **References**

- 551 1. Lori JR, Williams JE, Kukula VA, Apetorgbor VE, Awini EA, Amankwah G, et al. Group  
552 Antenatal Care in Ghana: Protocol for a Cluster Randomized Controlled Trial. *JMIR Res*  
553 *Protoc.* 2022;11(9):e40828.
- 554 2. Jafari F, Eftekhari H, Mohammad K, Fotouhi A. Does group prenatal care affect satisfaction  
555 and prenatal care utilization in Iranian pregnant women? *Iran J Public Health.*  
556 2010;39(2):52.
- 557 3. Lori JR, Chuey M, Munro-Kramer ML, Ofosu-Darkwah H, Adanu RMK. Increasing postpartum  
558 family planning uptake through group antenatal care: a longitudinal prospective cohort  
559 design. *Reprod Health.* 2018 Dec 17;15(1):208.
- 560 4. Patil CL, Klima CS, Leshabari SC, Steffen AD, Pauls H, McGown M, et al. Randomized  
561 controlled pilot of a group antenatal care model and the sociodemographic factors  
562 associated with pregnancy-related empowerment in sub-Saharan Africa. *BMC Pregnancy*  
563 *Childbirth.* 2017;17(2):1–10.
- 564 5. Adaji SE, Jimoh A, Bawa U, Ibrahim HI, Olorukooba AA, Adelaiye H, et al. Women’s  
565 experience with group prenatal care in a rural community in northern Nigeria. *Int J Gynecol*  
566 *Obstet.* 2019;145(2):164–9.
- 567 6. Thapa P, Bangura AH, Nirola I, Citrin D, Belbase B, Bogati B, et al. The power of peers: an  
568 effectiveness evaluation of a cluster-controlled trial of group antenatal care in rural Nepal.  
569 *Reprod Health.* 2019;16:1–14.

- 570 7. McKinnon B, Sall M, Vandermorris A, Traoré M, Lamesse-Diedhiou F, McLaughlin K, et al.  
571 Feasibility and preliminary effectiveness of group antenatal care in Senegalese health posts:  
572 a pilot implementation trial. *Health Policy Plan.* 2020;35(5):587–99.
- 573 8. Lundeen T, Musange S, Azman H, Nzeyimana D, Murindahabi N, Butrick E, et al. Nurses’ and  
574 midwives’ experiences of providing group antenatal and postnatal care at 18 health centers  
575 in Rwanda: a mixed methods study. *PLoS One.* 2019;14(7):e0219471.
- 576 9. Taylor JA, Davis RL, Kemper KJ. A randomized controlled trial of group versus individual well  
577 child care for high-risk children: maternal-child interaction and developmental outcomes.  
578 *Pediatrics.* 1997;99(6):e9–e9.
- 579 10. Ickovics JR, Kershaw TS, Westdahl C, Magriples U, Massey Z, Reynolds H, et al. Group  
580 prenatal care and perinatal outcomes: a randomized controlled trial. *Obstet Gynecol.*  
581 2007;110(2 Pt 1):330–9.
- 582 11. Grenier L, Suhowatsky S, Kabue MM, Noguchi LM, Mohan D, Karnad SR, et al. Impact of  
583 group antenatal care (G-ANC) versus individual antenatal care (ANC) on quality of care, ANC  
584 attendance and facility-based delivery: a pragmatic cluster-randomized controlled trial in  
585 Kenya and Nigeria. *PLoS One.* 2019;14(10):e0222177.
- 586 12. Sharma J, O’Connor M, Rima Jolivet R. Group antenatal care models in low- and middle-  
587 income countries: a systematic evidence synthesis. *Reprod Health.* 2018 Mar 5;15(1):38.
- 588 13. Taylor JA, Davis RL, Kemper KJ. Health care utilization and health status in high-risk children  
589 randomized to receive group or individual well child care. *Pediatrics.* 1997;100(3):e1–e1.

- 590 14. Taylor JA, Kemper KJ. Group well-child care for high-risk families: maternal outcomes. Arch  
591 Pediatr Adolesc Med. 1998;152(6):579–84.
- 592 15. IHE/Haiti IH de l’Enfance, ICF. Haiti Enquête Mortalité, Morbidité et Utilisation des Services  
593 2016-2017 - EMMUS-VI [Internet]. 2018 Jul [cited 2023 Sep 12] p. 689. Available from:  
594 <https://dhsprogram.com/publications/publication-fr326-dhs-final-reports.cfm>
- 595 16. World Health Organization, World Bank, United Nations Population Fund, United Nations  
596 Children’s Fund (UNICEF). Trends in maternal mortality: 1990-2015: estimates from WHO,  
597 UNICEF, UNFPA, World Bank Group and the United Nations Population Division [Internet].  
598 Geneva: World Health Organization; 2015 [cited 2023 Nov 27]. Available from:  
599 <https://iris.who.int/handle/10665/194254>
- 600 17. World Bank. World Bank Open Data: Haiti. 2021 [cited 2023 Nov 30]. Mortality rate,  
601 neonatal (per 1,000 live births) - Haiti. Available from:  
602 <https://data.worldbank.org/indicator/SH.DYN.NMRT?locations=HT>
- 603 18. UNICEF. UNICEF DATA. [cited 2024 Jan 26]. Haiti (HTI) - Demographics, Health & Infant  
604 Mortality. Available from: <https://data.unicef.org/country/hti/>
- 605 19. World Bank. World Bank Open Data. 2021 [cited 2023 Nov 30]. Mortality rate, infant (per  
606 1,000 live births) - Haiti. Available from:  
607 <https://data.worldbank.org/indicator/SP.DYN.IMRT.IN?locations=HT>
- 608 20. l’Institut Haïtien de l’Enfance (IHE), l’Institut Haïtien de Statistique et d’Informatique (IHSI).  
609 Enquête Mortalité, Morbidité et Utilisation des Services (EMMUS-VI) 2016-2017 [Internet].

- 610 le Ministère de la Santé Publique et de la Population (MSPP); 2018 Aug [cited 2023 Sep 1] p.  
611 177. Available from: <https://www.unicef.org/haiti/media/346/file/%20EMMUS-VI-Rapport->  
612 [de-synth%C3%A8se-2018.pdf](https://www.unicef.org/haiti/media/346/file/%20EMMUS-VI-Rapport-de-synth%C3%A8se-2018.pdf)
- 613 21. Petrou S. The economic consequences of preterm birth during the first 10 years of life. *BJOG*  
614 *Int J Obstet Gynaecol.* 2005;112:10–5.
- 615 22. Farmer P. Partners in help: Assisting the poor over the long term. *Foreign Aff.* 2011;29:7.
- 616 23. Palazuelos D, Farmer PE, Mukherjee J. Community health and equity of outcomes: the  
617 Partners In Health experience. *Lancet Glob Health.* 2018 May;6(5):e491–3.
- 618 24. Strauss AL, Corbin JM. *Basics of qualitative research: techniques and procedures for*  
619 *developing grounded theory.* 2nd ed. Thousand Oaks: Sage Publications; 1998. 312 p.
- 620 25. Prins A, Kone A, Nolan N, Thatte N. USAID/Haiti Maternal and Child Health and Family  
621 Planning Portfolio Review and Assessment [Internet]. 2008 [cited 2023 Nov 28] p. 85.  
622 Available from: [https://pdf.usaid.gov/pdf\\_docs/PDACP887.pdf](https://pdf.usaid.gov/pdf_docs/PDACP887.pdf)
- 623 26. Atif N, Nazir H, Zafar S, Chaudhri R, Atiq M, Mullany LC, et al. Development of a  
624 Psychological Intervention to Address Anxiety During Pregnancy in a Low-Income Country.  
625 *Front Psychiatry* [Internet]. 2020 [cited 2023 Dec 17];10. Available from:  
626 <https://www.frontiersin.org/articles/10.3389/fpsy.2019.00927>
- 627 27. Dennis CL, Falah-Hassani K, Shiri R. Prevalence of antenatal and postnatal anxiety:  
628 Systematic review and meta-analysis. *Br J Psychiatry.* 2017 May;210(5):315–23.

- 629 28. Nielsen-Scott M, Fellmeth G, Opondo C, Alderdice F. Prevalence of perinatal anxiety in low-  
630 and middle-income countries: A systematic review and meta-analysis. *J Affect Disord.* 2022  
631 Jun 1;306:71–9.
- 632 29. Roddy Mitchell A, Gordon H, Lindquist A, Walker SP, Homer CSE, Middleton A, et al.  
633 Prevalence of Perinatal Depression in Low- and Middle-Income Countries: A Systematic  
634 Review and Meta-analysis. *JAMA Psychiatry.* 2023 May 1;80(5):425–31.
- 635 30. Staneva A, Bogossian F, Pritchard M, Wittkowski A. The effects of maternal depression,  
636 anxiety, and perceived stress during pregnancy on preterm birth: A systematic review.  
637 *Women Birth.* 2015 Sep 1;28(3):179–93.
- 638 31. Loughnan SA, Wallace M, Joubert AE, Haskelberg H, Andrews G, Newby JM. A systematic  
639 review of psychological treatments for clinical anxiety during the perinatal period. *Arch*  
640 *Womens Ment Health.* 2018 Oct 1;21(5):481–90.
- 641 32. Centers for Disease Control and Prevention. National Center for Health Statistics. 2023  
642 [cited 2023 Dec 15]. Maternal Mortality Rates in the United States, 2021. Available from:  
643 [https://www.cdc.gov/nchs/data/hestat/maternal-mortality/2021/maternal-mortality-rates-](https://www.cdc.gov/nchs/data/hestat/maternal-mortality/2021/maternal-mortality-rates-2021.htm)  
644 [2021.htm](https://www.cdc.gov/nchs/data/hestat/maternal-mortality/2021/maternal-mortality-rates-2021.htm)
- 645 33. Lewis JB, Cunningham SD, Shabanova V, Hassan SS, Magriples U, Rodriguez MG, et al. Group  
646 prenatal care and improved birth outcomes: Results from a type 1 hybrid effectiveness-  
647 implementation study. *Prev Med.* 2021;153:106853.

- 648 34. Howell EA, Brown H, Brumley J, Bryant AS, Caughey AB, Cornell AM, et al. Reduction of  
649 Peripartum Racial and Ethnic Disparities: A Conceptual Framework and Maternal Safety  
650 Consensus Bundle. *J Obstet Gynecol Neonatal Nurs*. 2018 May 1;47(3):275–89.
- 651 35. Hans SL, Edwards RC, Zhang Y. Randomized Controlled Trial of Doula-Home-Visiting  
652 Services: Impact on Maternal and Infant Health. *Matern Child Health J*. 2018 Oct  
653 1;22(1):105–13.

654

## 655 **Supporting information**

656 **S1 Appendix 1. JOURNEY 9 PLUS PROGRAMMATIC PILLARS**

657 **S2 Diagram 1. Inclusion criteria from women delivering in 2019 at HUM**
